# Supplementary material
Source: Research Square preprint supplement (doi:10.21203/rs.3.rs-10085456/v1)
Supplement: Supplementary file 1 [file d49ed93c860085e91b2af814.docx]

**Consumer Perception and Policy Intervention in Large-scale Implementation of Advanced Autonomous Driving: A Dynamic Evolutionary Study Based on Agent-Based Modeling**

Hao Zhang a, Pei-Feng Zhub, *

a College of Economics & Management, Nanjing University of Aeronautics and Astronautics, Nanjing 211106, China. Zhanghao0216@nuaa.edu.cn

b School of Health Economics & Management, Nanjing University of Chinese Medicine, Nanjing 210023, China. 280702@njucm.edu.cn

*Corresponding author. Email: [280702@njucm.edu.cn](mailto:280702@njucm.edu.cn)

**Data Availability**

The data supporting this study’s findings are available from the corresponding author upon reasonable request.

**Conflicts of Interest/ Declaration of interest**

The authors declared no potential conflicts of interest with respect to the research, authorship, and/or publication of this article.

**Credit authorship contribution statement**

**Hao zhang**: conceptualization; Methodology; Investigation; Writing - Original Draft; Review & editing. **Peifeng Zhu**: Writing –Resource, Software; supervision.

**Funding statement**

This work was supported by Nanjing University of Aeronautics and Astronautics 2024 Undergraduate Innovation and Entrepreneurship Training Program Project “Research on Regional Differences Among New Energy Vehicle Consumers and the Factors Influencing These Differences” (granted numbers 2024CX009038)

**Declaration of generative AI and AI-assisted technologies in the writing process**

During the preparation of this work, the authors used DeepSeek to check grammar, spelling, style, and to rephrase some sentences. After using this tool, the authors reviewed and edited the content as needed and take full responsibility for the content of the publication.
